# Supplementary material
Source: MDPI journal article supplement (https://www.mdpi.com/2073-4441/15/24/4298)
Supplement: s1 [file s1 › water-2752335-supplementary.pdf]

## **Supplemental Information**

**C/N ratio's effect on a membrane aerated biofilm reactor (MABR): COD and nitrogen removal, biofilm characteristics, and microbial community structure**

Huiyun Zhong<sup>a</sup>, Liangfei Dong<sup>a,\*</sup>, Yuanyuan Tang<sup>b</sup>, Lin Qi<sup>b</sup>, Mengyu Wang<sup>b</sup>

<sup>a</sup> School of Urban Construction, Changzhou University, Changzhou 213164, China

<sup>b</sup> School of Environmental Science and Engineering, Changzhou University,  
Changzhou 213164, China

\*Corresponding author: Liangfei Dong

Email: dlf@cczu.edu.cn

Full postal address: No.21, Gehu Rd, Wujin District, Changzhou 213164, China

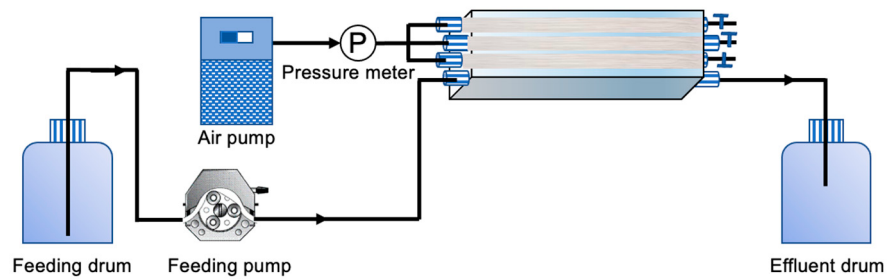

**Figure S1.** The set-up of the lab-scale MABR system.
